## Mechanical Ventilation of Newborn Infants:

### II. Effects of Independent Variation of Rate and Pressure on Arterial Oxygenation of Infants with Respiratory Distress Syndrome

Penelope Cave Smith, M.B., B.S.,\* Elisabeth Schach, M.S.,†  
William J. R. Daily, M.D.‡

Respiratory rate and peak airway pressure were independently varied during controlled mechanical ventilation of infants with severe respiratory distress syndrome. During the first five days of mechanical ventilation five newborn infants were studied four times each. Each study consisted of six predetermined rate and/or pressure changes. Pressures ranged from 21 to 53 cm H<sub>2</sub>O and rates from 8 to 40 breaths/min. Changes in  $P_{aO_2}$ ,  $P_{aCO_2}$ , and  $pH_a$ , the dependent variables, were correlated with changes in the independent variables, rate and pressure. When pressure is increased,  $P_{aO_2}$  and  $pH_a$  increase and  $P_{aCO_2}$  decreases. When rate is increased,  $P_{aO_2}$  and  $P_{aCO_2}$  decrease and  $pH_a$  increases. The magnitudes of the changes in dependent variables for unit changes in rate and pressure are given. Specific variations of rate and/or pressure during controlled mechanical ventilation of infants with respiratory distress syndrome do result in changes in  $P_{aO_2}$ ,  $P_{aCO_2}$ , and  $pH_a$ , which are predictable in magnitude and direction. (Key words: Prolonged mechanical ventilation; IPPV/I; Respiratory rate; Airway pressure; Newborn infants; Respiratory distress syndrome.)

\* Clinical Assistant Professor of Anesthesia. Present address: Department of Anesthesia, University Hospital of San Diego County, 225 West Dickinson, San Diego, California 92103.

† Assistant Professor of Medical Care and Hospitals. Present address: School of Hygiene and Public Health, The Johns Hopkins University, Baltimore, Maryland.

‡ Assistant Professor of Pediatrics. Supported in part by a Grant from the Educational Foundation of America. Present address: Good Samaritan Hospital, 1033 East McDowell Road, Phoenix, Arizona 85006.

Received from the Department of Pediatrics, the Center for Premature Infants, and the Department of Anesthesia, Stanford University Hospital, Stanford, California 94305. Accepted for publication April 11, 1972. Supported by Grants from the United States Public Health Service (GN-FR 81), PHS Research Grant No. 5 R01 HS00110 from the National Center for Health Services Research and Development, The John A. Hartford Foundation, and the National Institutes of Health (FR 00311-02).

WE HAVE DEMONSTRATED that arterial oxygenation of infants with respiratory distress syndrome (RDS) can be increased during intermittent positive-pressure ventilation (IPPV/I) by simultaneously increasing peak airway pressure ( $P_{aw}$ ) and decreasing respiratory rate/min ( $f$ ) in a manner which does not significantly alter  $P_{aCO_2}$  or  $pH_a$ .<sup>1</sup> We observed that the changes we found in  $P_{aO_2}$  while keeping alveolar ventilation almost constant might have been influenced by the sequence ("path") of concomitant rate and pressure changes. The present study was designed to eliminate this "path" effect and to determine the effects of independent variations of rate and pressure on  $P_{aO_2}$ ,  $P_{aCO_2}$ , and  $pH_a$ .

#### Methods

Five infants with respiratory distress syndrome (RDS) of sufficient severity to necessitate mechanical ventilation of the lungs were studied (table 1). The diagnosis of RDS was made when grunting, nasal flaring, and sternal or subcostal retraction were present together with a radiograph of the chest showing reticulogranularity and an air bronchogram. The initial care of the newborn infants and the method of selection for IPPV/I have been described.<sup>2</sup> This method of selection ensured that all babies studied were in a similar clinical condition.

For the present investigation any one study of one infant consisted of a sequence of four sets of measurements which were designed to eliminate the "path" influence on the dependent variables. For each of five infants a series of four substudies was designed to assess the influence of the independent (controlled) variables, rate and pressure, on the dependent variables,  $P_{aO_2}$ ,  $P_{aCO_2}$ , and  $pH_a$ . To investigate the effect of each controlled variable separately,

TABLE 1. Prevention Data for the Five Infants

|          | Sex,<br>Weight<br>(g) | Time of<br>Blood<br>Sampling<br>(Min<br>before<br>IPPV/I) | Age at<br>Onset of<br>IPPV/I<br>(Hours) | Blood-Gas Values and Score Prior to Initiation of<br>Mechanical Ventilation* |                   |                 |       |       | Outcome  |
|----------|-----------------------|-----------------------------------------------------------|-----------------------------------------|------------------------------------------------------------------------------|-------------------|-----------------|-------|-------|----------|
|          |                       |                                                           |                                         | Pao <sub>2</sub>                                                             | Paco <sub>2</sub> | pH <sub>a</sub> | Other | Score |          |
| Infant 1 | M, 2,098              | 300                                                       | 74                                      | 96                                                                           | 100               | 7.19            | Apnea | 8     | Survived |
| Infant 2 | M, 2,400              | 10                                                        | 62                                      | 35                                                                           | 115               | 7.28            | —     | 7     | Survived |
| Infant 3 | M, 2,500              | 30                                                        | 55                                      | 30                                                                           | 71                | 7.24            | Apnea | 9     | Survived |
| Infant 4 | F, 1,503              | —                                                         | 3                                       | —                                                                            | —                 | —               | Apnea | 3     | Died     |
| Infant 5 | M, 3,510              | 60                                                        | 41                                      | 34                                                                           | 40                | 7.29            | —     | 4     | Survived |
| MEAN     | 2,402.2               | 100                                                       | 47                                      | 48.75                                                                        | 81.5              | 7.25            |       |       |          |

\* Arterial blood-gas values and pH obtained after administration of sodium bicarbonate with the infants breathing 100 per cent oxygen. Infants were scored according to the system for selection for mechanical ventilation previously reported.<sup>2</sup>

a scheme was chosen such that for each level of one controlled variable the other one was balanced to make the correlation between them ideally equal to zero. The actual correlation coefficients between rate and pressure for the five infants are presented in table 2.

Each infant was studied four times during the first five days of IPPV/I, approximately 24 hours apart. As an example, the sequence and increments of rate and pressure and the actual rates and pressures used for each of the four studies designed for one infant are shown in table 3. Study designs for the other infants followed the same principles, but were not identical to the one shown.

Bennett PR2 ventilators with infant minimum-deadspace circles and polyvinyl nasotracheal tubes § were used. Peak airway pressure and respiratory frequency were adjusted at the start of IPPV/I so that PaCO<sub>2</sub> was between 30 and 40 torr. The I:E ratio of the Bennett PR2 ventilators was fixed at 1:1.2 and the end-inspiratory flow rate was less than 0.1 l/sec. The airway-pressure curve was recorded on a Brush direct-writing oscillograph. An 18-gauge needle was inserted near the endotracheal tube on the inspiratory limb of the circle, and attached to it was a stiff catheter which led to a Statham PM5 strain gauge. Peak airway pressure in cm H<sub>2</sub>O (P<sub>aw</sub>) was measured directly, and respiratory rate in

breaths/min (f) was measured by counting the number of pressure peaks from the chart recordings. Rate and pressure settings on the ventilator were changed every half hour, and aortic blood samples were drawn after 25 minutes of undisturbed IPPV/I. The nasotracheal tubes were cleared by suction with a polyethylene catheter ¶ before the change to the next levels of P<sub>aw</sub> and f. Catheters placed via an umbilical artery into the aorta were used routinely for blood sampling and fluid infusion. The tip was stationed above the diaphragm and distal to the ductus arteriosus. The position was verified by radiography. It has been shown that in infants with RDS and a patent ductus arteriosus PaO<sub>2</sub> often is lower in the aorta than in the right radial artery.<sup>3</sup> Throughout this report, PaO<sub>2</sub>, PaCO<sub>2</sub>, and pH<sub>a</sub> refer to values in aortic blood samples. All samples were drawn into heparinized 1-ml plastic syringes \*\* sealed immediately with mercury-filled

TABLE 2. Correlation Coefficients for Independent Variables, Respiratory Rate and Airway Pressure

|          | Correlation Coefficient |
|----------|-------------------------|
| Infant 1 | -.06                    |
| Infant 2 | .44*                    |
| Infant 3 | -.06                    |
| Infant 4 | .11                     |
| Infant 5 | -.04                    |

\* The protocol could not be strictly adhered to for four of the 28 settings.

§ Foregger For-Clear.

¶ Intramedic PE 205.

\*\* Tomac.

TABLE 3A. Protocol for the Magnitudes and Sequence of Rate and Pressure Changes To Be Made in the Four Studies of Infant 4\*

|    | Study 1                                   |            | Study 2                                   |            | Study 3                                   |            | Study 4                                   |            |
|----|-------------------------------------------|------------|-------------------------------------------|------------|-------------------------------------------|------------|-------------------------------------------|------------|
|    | $\Delta P$                                | $\Delta R$ | $\Delta P$                                | $\Delta R$ | $\Delta P$                                | $\Delta R$ | $\Delta P$                                | $\Delta R$ |
| 1) | Starting measurements at onset of Study 1 |            | Starting measurements at onset of Study 2 |            | Starting measurements at onset of Study 3 |            | Starting measurements at onset of Study 4 |            |
| 2) | +5                                        | -10        | -5                                        | +10        | -5                                        | +10        | +5                                        | +10        |
| 3) | -5                                        | Same       | +5                                        | Same       | Same                                      | -10        | Same                                      | -10        |
| 4) | -5                                        | Same       | +5                                        | Same       | Same                                      | -10        | Same                                      | -10        |
| 5) | +10                                       | +20        | -10                                       | -20        | +10                                       | +20        | -10                                       | +20        |
| 6) | -5                                        | Same       | +5                                        | Same       | Same                                      | -10        | Same                                      | -10        |
| 7) | -5                                        | Same       | +5                                        | Same       | Same                                      | -10        | Same                                      | -10        |

TABLE 3B. Actual Rate and Pressure Settings Used in the Four Studies of Infant 4†

|    | Study 1 |    | Study 2 |    | Study 3 |    | Study 4 |    |
|----|---------|----|---------|----|---------|----|---------|----|
|    | P       | R  | P       | R  | P       | R  | P       | R  |
| 1) | 35      | 40 | 40      | 32 | 45      | 35 | 38      | 25 |
| 2) | 40      | 30 | 35      | 42 | 40      | 45 | 43      | 35 |
| 3) | 35      | 30 | 40      | 42 | 40      | 35 | 43      | 25 |
| 4) | 30      | 30 | 45      | 42 | 40      | 25 | 43      | 15 |
| 5) | 40      | 50 | 35      | 22 | 50      | 45 | 33      | 35 |
| 6) | 35      | 50 | 40      | 22 | 50      | 35 | 33      | 25 |
| 7) | 30      | 50 | 45      | 22 | 50      | 25 | 33      | 15 |

\*  $\Delta P$  = change in peak airway pressure in cm H<sub>2</sub>O from previous setting;  $\Delta R$  = change in respiratory rate in breaths/min from previous setting; "same" indicates no change from previous setting.

† P = peak airway pressure in cm H<sub>2</sub>O; R = respiratory rate in breaths/min.

caps, mixed, and placed in ice, and analyzed for  $pH_a$ ,  $Pa_{CO_2}$ , and  $Pa_{O_2}$  within 15 minutes. Corrections were made to accommodate the difference between the temperature of the electrode (38 C) and the rectal temperature of the infant.

Pearson product-moment correlation coefficients<sup>4</sup> were computed for  $Pa_{O_2}$ ,  $Pa_{CO_2}$ , and  $pH_a$  with rate and pressure for all studies of each infant. Since these coefficients varied from infant to infant, only their means are reported. Multiple correlation coefficients, calculated for  $Pa_{O_2}$ ,  $Pa_{CO_2}$ , and  $pH_a$  with rate and pressure, were also computed.

Regression coefficients and their standard deviations for each pair of a controlled and an independent variable were obtained for all four studies of each of the five infants. These coefficients were then tested for significance (t test), resulting in five (one for each baby) P values for each pair of independent and de-

pendent variables. In order to obtain a summary statement about the whole data set, one overall regression analysis was performed for all five infants, and confidence limits for the resulting regression coefficients were computed.

### Results

The range of respiratory rates used was 8–40 breaths/min and that of peak airway pressures was 21–53 cm H<sub>2</sub>O.  $Pa_{O_2}$ 's ranged from 1 to 104 torr,  $Pa_{CO_2}$ 's from 18 to 51 torr, and  $pH_a$ 's from 7.30 to 7.62.

The relationships between the independent variables,  $f$  and  $P_{aw}$ , and the dependent variables,  $Pa_{O_2}$ ,  $Pa_{CO_2}$ , and  $pH_a$ , were found to be significant. The directions and the magnitudes of the relationships between the two types of variables are summarized in table 4. When pressure is increased independently of a rate change,  $Pa_{O_2}$  and  $pH_a$  increase and  $Pa_{CO_2}$  decreases. When rate is increased independently

of an airway-pressure change,  $P_{aO_2}$  and  $P_{aCO_2}$  decrease, while  $pH_a$  increases.  $P_{aO_2}$  increases when the rate is decreased and peak airway pressure is increased simultaneously. The effects of such a change on  $P_{aCO_2}$  and  $pH_a$  depend on the relative weights of the independent variables. Similarly, if pressure and rate are increased at the same time, the result is a decrease in  $P_{aCO_2}$  and an increase in  $pH_a$ , while the ultimate effect on  $P_{aO_2}$  will depend on the relative weights given to rate and pressure.

The 99 per cent confidence limits for the regression coefficients are given in table 5. Owing to the small number of infants studied, these confidence limits are somewhat wide.

Average simple and multiple correlation coefficients obtained for the independent and dependent variables are given in table 6. The simple correlation coefficients relating either one or the other of the independent variables to the dependent variables agree in sign with the data presented in table 4. The multiple correlation coefficients illustrate the degree to which rate and pressure combined are correlated with the three dependent variables,  $P_{aO_2}$ ,  $P_{aCO_2}$  and  $pH_a$ .

### Discussion

During controlled IPPV/I of infants with respiratory distress syndrome, aortic  $P_{O_2}$  can be increased without significant alteration of  $P_{aCO_2}$  or  $pH_a$  when, concomitantly, airway pressure is increased and respiratory rate decreased.<sup>1</sup> Alteration of inspiratory flow rate and of the inspiration-expiration ratio during assisted IPPV/I has also been shown to influence oxygenation of infants with RDS significantly.<sup>5</sup> These observations suggest that specific determinants of IPPV/I significantly and predictably influence arterial oxygen tension. The data also indicate that adequate alveolar ventilation ( $P_{aCO_2}$ ) can be achieved during IPPV/I of infants in severe respiratory distress and that oxygenation of these infants can be influenced independently of alveolar ventilation.

That an incremental increase in pressure, and thus tidal volume ( $V_T$ ), increases alveolar ventilation and oxygenation more than an incremental increase in rate is not surprising. An

TABLE 4. Regression Coefficients of Peak Airway Pressure and Respiratory Rate for the Three Dependent Variables\*

| Dependent Variables | Independent Variables                      |                                |
|---------------------|--------------------------------------------|--------------------------------|
|                     | Peak Airway Pressure (cm H <sub>2</sub> O) | Respiratory Rate (Breaths/Min) |
| $P_{aO_2}$ (torr)   | +1.84                                      | -1.37                          |
| $P_{aCO_2}$ (torr)  | -0.40                                      | -0.20                          |
| $pH_a$              | +0.007                                     | +0.003                         |

\* Values consist of slopes of regression lines when rate or pressure is increased by one unit. Since prior to analysis the data were adjusted for each infant, intercepts of these lines are close to zero and have no importance for this analysis.

TABLE 5. The 99 Per Cent Confidence Limits for the Regression Coefficients of Rate and Pressure for  $P_{aO_2}$ ,  $P_{aCO_2}$  and  $pH_a$ \*

| Dependent Variables | 99 Per Cent Confidence Limits                     |                                      |
|---------------------|---------------------------------------------------|--------------------------------------|
|                     | Independent Variable, Pressure (P <sub>aw</sub> ) | Independent Variable, Rate (f)       |
| $P_{aO_2}$          | $0.16 \leq \beta_{11} \leq 3.52$                  | $-2.21 \leq \beta_{12} \leq -0.50$   |
| $P_{aCO_2}$         | $-0.76 \leq \beta_{21} \leq -0.04$                | $-0.38 \leq \beta_{22} \leq -0.02$   |
| $pH_a$              | $0.004 \leq \beta_{31} \leq 0.010$                | $0.0015 \leq \beta_{32} \leq 0.0045$ |

\*  $\beta_{11}$  = regression coefficient of pressure on  $P_{aO_2}$ ,  
 $\beta_{12}$  = regression coefficient of pressure on  $P_{aCO_2}$ ,  
 $\beta_{13}$  = regression coefficient of pressure on  $pH_a$ ,  
 $\beta_{21}$  = regression coefficient of rate on  $P_{aO_2}$ ,  
 $\beta_{22}$  = regression coefficient of rate on  $P_{aCO_2}$ ,  
 $\beta_{23}$  = regression coefficient of rate on  $pH_a$ .

TABLE 6. Average Simple and Multiple Correlation Coefficients between Independent and Dependent Variables

| Dependent Variables | Simple Correlation Coefficients, Independent Variables* |      | Multiple Coefficients |
|---------------------|---------------------------------------------------------|------|-----------------------|
|                     | P <sub>aw</sub>                                         | f    |                       |
| $P_{aO_2}$          | .36                                                     | -.25 | .52                   |
| $P_{aCO_2}$         | -.05                                                    | -.24 | .44                   |
| $pH_a$              | .10                                                     | .36  | .50                   |

\* P<sub>aw</sub> = peak airway pressure in cm H<sub>2</sub>O;  
 f = respiratory rate in breaths/min.

increase in  $V_T$  would not alter the deadspace significantly, but would encroach upon the reserve volumes, probably enlarging FRC, thus enabling better oxygenation and alveolar ventilation.

Our studies do not explain the mechanism for the negative correlation of  $\text{PaO}_2$  with rate and its positive correlation with pressure. Hypercarbia and acidosis both cause constriction of pulmonary vessels, which would alter the ventilation/perfusion relationship. Thus, when rate is increased  $\text{PaCO}_2$  decreases (see table 4), and the alkalosis produced would decrease pulmonary vascular resistance. The expected improvement in oxygenation does not occur, whether or not the subject was originally hypoxic or hyperoxic. Thus, it must be that the slow rates and high pressures lead to a ventilation-perfusion relationship that is more nearly normal and a decrease in left-to-right shunt.

Analysis of previous data suggested that the order in which rate and pressure were changed ("path") could have influenced the results obtained. The present study was designed to eliminate such "path" dependencies and to determine whether rate and pressure influenced  $\text{pH}_a$ ,  $\text{PaO}_2$ , and  $\text{PaCO}_2$  independently. The results demonstrated that variations of either rate alone or pressure alone exert effects on aortic  $\text{PO}_2$ ,  $\text{PCO}_2$ , and  $\text{pH}$ . Whether this holds true for normal infants or those who have respiratory failure from causes other than RDS has not been investigated. A study of a group of infants, some with RDS and others with normal lungs ventilated with the Hammersmith ventilator, comparing rates and pressures with tidal volume and alveolar ventilation, has been reported.<sup>6</sup> Optimal rates and pressures for maximal alveolar ventilation were found, but correlations with blood-gas tensions or  $\text{pH}$  were not reported.

In our study an increase in respiratory rate and/or an increase in airway pressure resulted in a decrease in  $\text{pH}_a$ . Increasing pressure and/or decreasing rate increased  $\text{PaO}_2$ . However, when rate and pressure were simultaneously changed in the same direction, the direction of change in  $\text{PaO}_2$  depended on the relative weights given to rate and pressure. This underlines the absolute necessity for measuring  $\text{PaO}_2$ ,  $\text{PaCO}_2$ , and  $\text{pH}_a$  whenever determinants of minute ventilation are adjusted. Our data suggest that during IPPV/I of infants with severe RDS, specific alterations of variables of ventilation should result in more adequate and continuous control of oxygenation and better treatment of respiratory failure.

### References

1. Smith PC, Daily WJR, Fletcher C, et al: Mechanical ventilation of newborn infants I. The effect of rate and pressure on arterial oxygenation of infants with respiratory distress syndrome. *Pediatr Res* 3:244-254, 1969
2. Daily WJR, Meyer HBP, Sunshine P, et al: Mechanical ventilation of newborn infants: III. Historical comments and development of a scoring system for selection of infants. *ANESTHESIOLOGY* 34:119-126, 1971
3. Robertson NRC, Dahlenburg GW: Ductus arteriosus shunts in the respiratory distress syndrome. *Pediatr Res* 3:149-159, 1969
4. Ezekiel M, Fox KA: *Methods of Correlation and Regression Analysis*. Third edition. New York, Wiley & Sons, 1967
5. Owen-Thomas JB, Ulan OA, Swyer PR: The effect of varying inspiratory gas flow rate on arterial oxygenation during IPPV in the respiratory distress syndrome. *Br J Anaesth* 40:493-502, 1968
6. Picton-Warlow CG: Ventilator therapy in the newborn. Some mechanical considerations. *Arch Dis Child* 45:460-465, 1970
